# Supplementary material for: The Sclerotinia sclerotiorum ADP-Ribosylation Factor 6 Plays an Essential Role in Abiotic Stress Response and Fungal Virulence to Host Plants
Source: Preprints.org preprint supplement (doi:10.20944/preprints202311.1250.v1), 2023-11-20
Supplement: Supplementary file 2 [file Table S1.doc]

| **Table S1.** Primers used in study | | |
| --- | --- | --- |
| Primer name | Primer sequence | Primer function |
| UF | GACAATCCGAGCACTCAA | Amplification of upstream sequence of *SsArf6*. The red part presents homologous sequences from HY fragment using for homologous recombination. |
| UR | GTGCTCCTTCAATATCATCTTCTGT CGAGATATGCGTGTGTATG |
| DF | AGGTACACTTGTTTAGAGGTAATCCGCTCCAATCTACCTTCTCG | Amplification of upstream sequence of *SsArf6.* The red part presents homologous sequences from YG fragment using for homologous recombination. |
| DR | GGAATTGGAAAATGGGGT |
| HYGF | ACAGAAGATGATATTGAAGGAGCAC | Amplification of HY and YG fragment |
| HYR | GCATCATCGAAATTGCCGTCAACC |
| YGF | TCTCGGAGGGCGAAGAATCTCGTGC |
| HYGR | GGATTACCTCTAAACAAGTGTACCT |
| UF1 | GACTCTTACCTCGCAATGAA | Check if the position of homologous substitution is correct |
| HYR1 | CGTTCCTGTCTGCTAATAAG |
| YGF1 | TAGTGAATGCTCCGTAACA |
| DR1 | CTCGGTCATTGATTGTGTATAG |
| Arf6F | GACTCTTACCTCGCAATGAA | Amplification of upstream and full-length sequences of *SsArf6*.The lowercase part presents homologous sequences from NEO fragment using for  homologous recombination. |
| Arf6R | agtgctccttcaatatcatcttctgCTTTGCTTGTGGAGCAGG |
| NEOF | CAGAAGATGATATTGAAGGAGCAC | Amplification of NEO sequence of G418 resistance gene |
| NEOR | GGATTACCTCTAAACAAGTGTACCT |
| checkF | GTAGAGACGGTGACATATAAGA | Knockout transformants identification |
| checkR | CATACCAATCCTTCCATTAACC |
| checkF | GTAGAGACGGTGACATATAAGA | Complementation transformants identification |
| NER | CGTCAAGAAGGCGATAGAA |
| EOF | TCTCCTGTCATCTCACCTT |
| DR | GGAATTGGAAAATGGGGT |
| SsTubqF | ACCTCCATCCAAGAACTC | Amplification of reference gene |
| SsTubqR | GAACTCCATCTCGTCCAT |
